# Supplementary material
Source: publisher figshare collection journal article supplement (https://gsajournals.figshare.com/ndownloader/files/13878968)
Supplement: Supplementary file 1 [file 13878968]

Table S2 The transposase genes predicted in the *M. dispar* GS01 genome

| Locus | Product | Protein length (aa) | Position |
| --- | --- | --- | --- |
| M.dispar-GS01_GM000137 | transposase | 114 | 178838…179182 |
| M.dispar-GS01_GM000180 | transposase | 132 | 221289…221687 |
| M.dispar-GS01_GM000336 | IS256 family transposase | 82 | 404783…405031 |
| M.dispar-GS01_GM000375 | transposase | 71 | 466289…466504 |
| M.dispar-GS01_GM000450 | transposase | 45 | 582183…582320 |
| M.dispar-GS01_GM000455 | ISMHp1 transposase | 554 | 586349…588013 |
| M.dispar-GS01_GM000506 | transposase, partial | 93 | 646671…646952 |
| M.dispar-GS01_GM000507 | IS256 family transposase | 162 | 647208…647696 |
| M.dispar-GS01_GM000510 | transposase | 115 | 650514…650861 |
| M.dispar-GS01_GM000511 | IS256 family transposase | 141 | 650875…651300 |
| M.dispar-GS01_GM000516 | transposase | 36 | 657912…658022 |
